# Supplementary material for: Determination of 3-acetyl-11-keto-β-boswellic acid in analytical and biological samples using streamlined and robust RP-HPLC method
Source: Royal Society of Chemistry journal article supplement (doi:10.1039/d4ay00814f), 2024-01-01
Supplement: d4ay00814f1.pdf [file d4ay00814f1.pdf]

**Determination of 3-Acetyl-11-keto- $\beta$ -boswellic acid in analytical and biological samples using streamlined and robust RP-HPLC method**

**Supplementary information:**

**Table 1S** Details of Calibration curve

| <b>Concentration<br/>(ng/mL)</b> | <b>Peak Area<br/>(Mean <math>\pm</math> SD) n=3</b> | <b>% RSD</b> |
|----------------------------------|-----------------------------------------------------|--------------|
| 250                              | 6838 $\pm$ 129.25                                   | 1.89         |
| 1000                             | 28745 $\pm$ 311.89                                  | 1.08         |
| 2000                             | 57517 $\pm$ 463.24                                  | 0.80         |
| 5000                             | 143082 $\pm$ 483.75                                 | 0.33         |
| 10000                            | 286730 $\pm$ 3572.33                                | 1.24         |
| 20000                            | 569143 $\pm$ 6761.27                                | 1.18         |

**SD: Standard deviation; RSD: Relative standard deviation**

### Chromatogram of quality control samples:

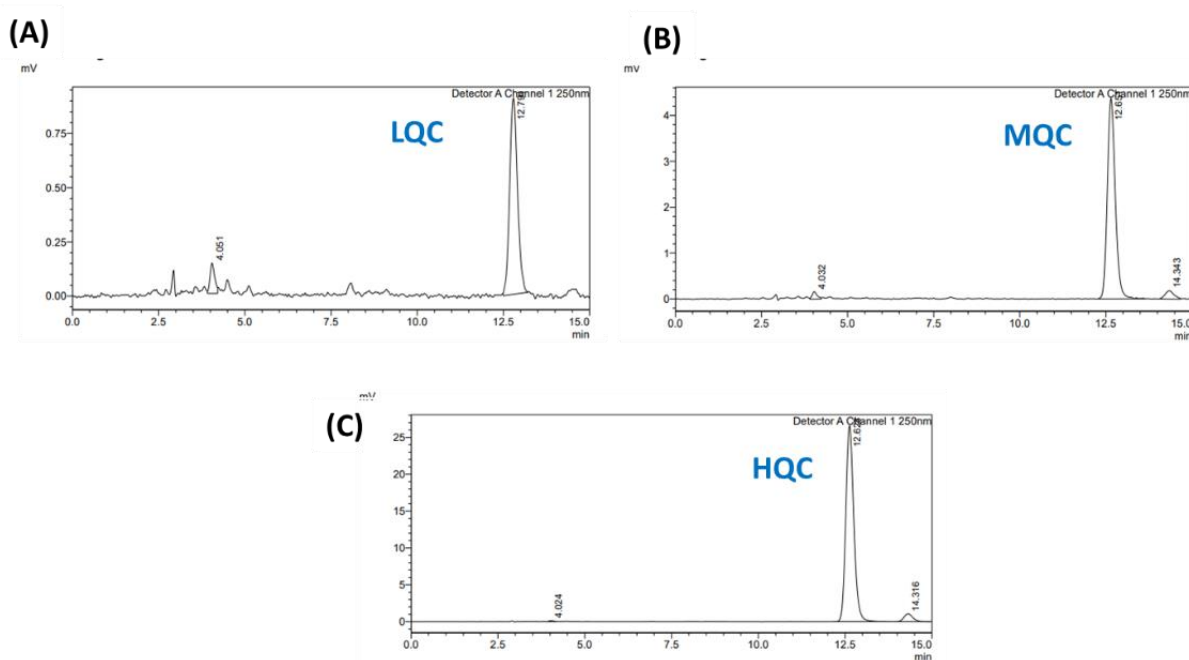

**Fig. 1S** Representative chromatogram of (A) Lower quality control samples (500 ng/mL), (B) Medium quality control samples (2500 ng/mL), (C) High-quality control samples (15000 ng/mL).
